# Supplementary material for: XPS and ARXPS for Characterizing Multilayers of Silanes on Gold Surfaces
Source: MDPI journal article supplement (doi:10.3390/coatings14030327), 2024-03-11
Supplement: s1 [file s1]

# XPS and ARXPS for Characterizing Multilayers of Silanes on Gold Surfaces

Giulio Casula, Marzia Fantauzzi, Bernhard Elsener and Antonella Rossi \*

Dipartimento di Scienze Chimiche e Geologiche, Università degli Studi di Cagliari, 09042 Cagliari, Italy; giulio.casula@unica.it (G.C.); fantauzzi@unica.it (M.F.); elsener@unica.it (B.E.)

\* Correspondence: rossi@unica.it

Table S1 Parameters used for the calculation of the relative sensitivity factors of the C 1s, Cl 2p, O 1s, S 2p, Si 2p, N 1s signals for M-gold samples and A-gold samples

|                   | Element        | Scofield photoionization cross-section ( $\sigma$ ) [units of 13600 barns [31]] | Asymmetry factor | Inelastic mean free-path ( $\lambda$ ) [nm] | Intensity/energy response function |
|-------------------|----------------|---------------------------------------------------------------------------------|------------------|---------------------------------------------|------------------------------------|
| MPTMS (Overlayer) | C 1s C-Si      | 1                                                                               | 1.278            | 3.016                                       | 0.866                              |
|                   | C 1s C-S       | 1                                                                               | 1.278            | 3.015                                       | 0.866                              |
|                   | C 1s Methoxy   | 1                                                                               | 1.278            | 3.013                                       | 0.866                              |
|                   | O 1s Si-O-Si   | 2.93                                                                            | 1.278            | 2.687                                       | 0.911                              |
|                   | S 2p           | 1.677                                                                           | 1.159            | 3.164                                       | 0.842                              |
|                   | Si 2p          | 0.817                                                                           | 1.140            | 3.237                                       | 0.830                              |
| APTES (Overlayer) | C 1s C-Si      | 1                                                                               | 1.278            | 3.016                                       | 0.797                              |
|                   | C 1s C-S       | 1                                                                               | 1.278            | 3.015                                       | 0.798                              |
|                   | C 1s Methoxy   | 1                                                                               | 1.278            | 3.013                                       | 0.798                              |
|                   | C 1s Carbamate | 1                                                                               | 1.278            | 3.01                                        | 0.799                              |
|                   | O 1s Si-O-Si   | 2.93                                                                            | 1.278            | 2.687                                       | 0.862                              |
|                   | S 2p           | 1.677                                                                           | 1.159            | 3.164                                       | 0.764                              |
|                   | Si 2p          | 0.817                                                                           | 1.140            | 3.237                                       | 0.747                              |
|                   | N 1s           | 1.8                                                                             | 1.278            | 2.867                                       | 0.828                              |

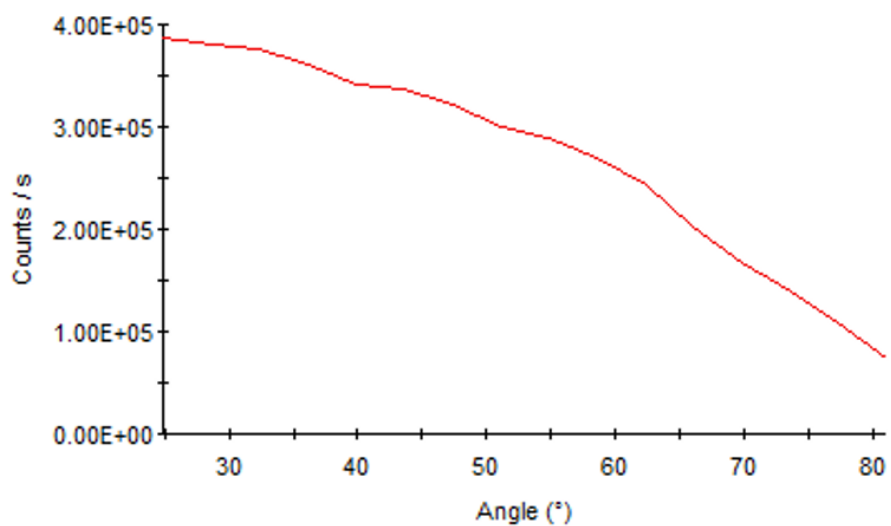

Figure S1 example of angle signature acquired on Ag 3d<sub>5/2</sub> peak at 150 eV pass energy

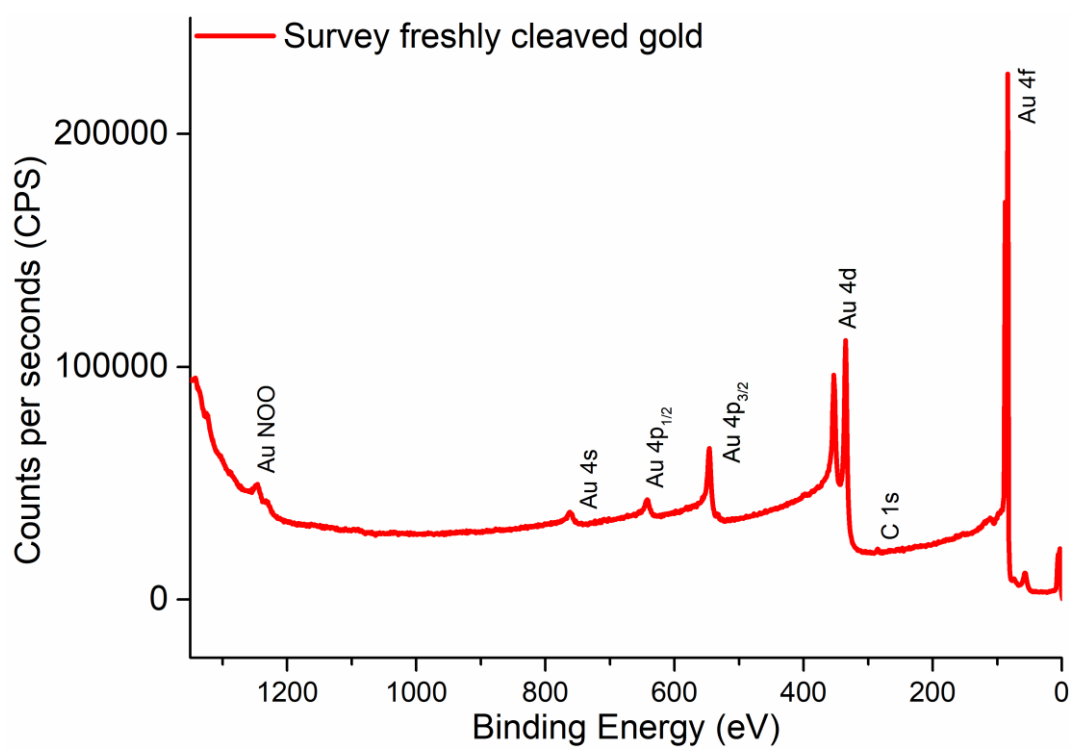

Figure S2 Example of survey spectrum of freshly cleaved gold sample

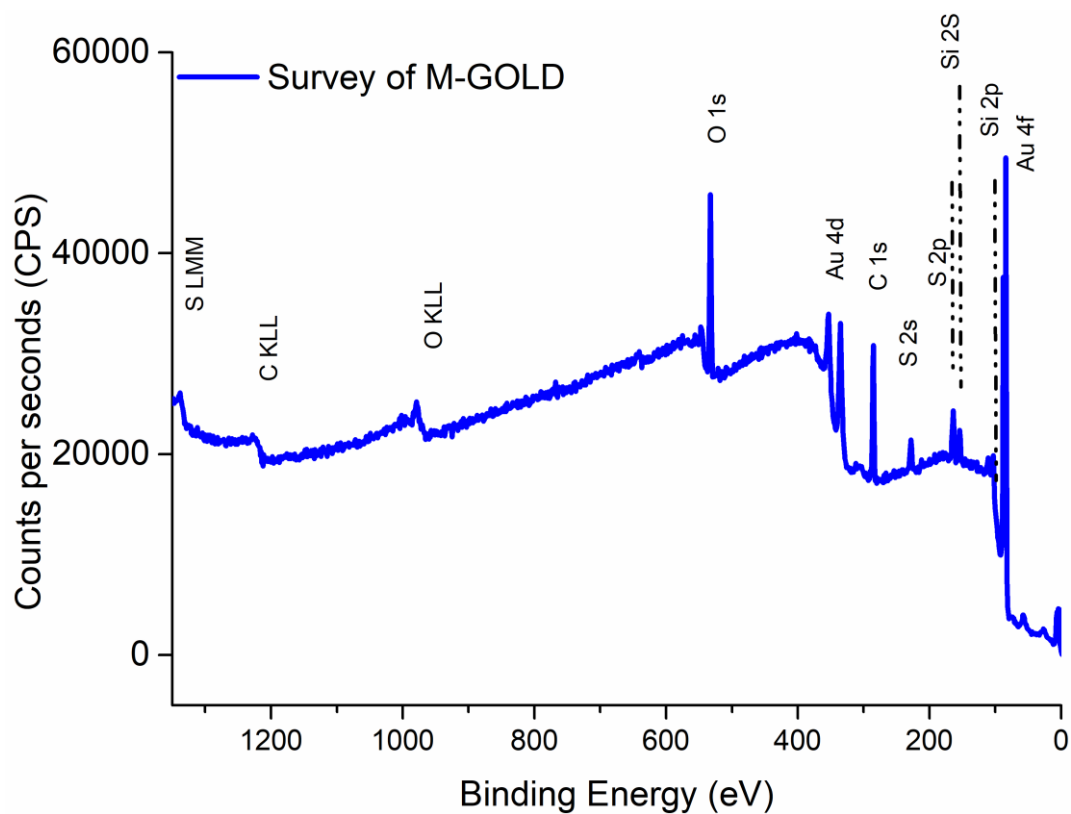

Figure S3 Example of survey spectrum of M-gold sample

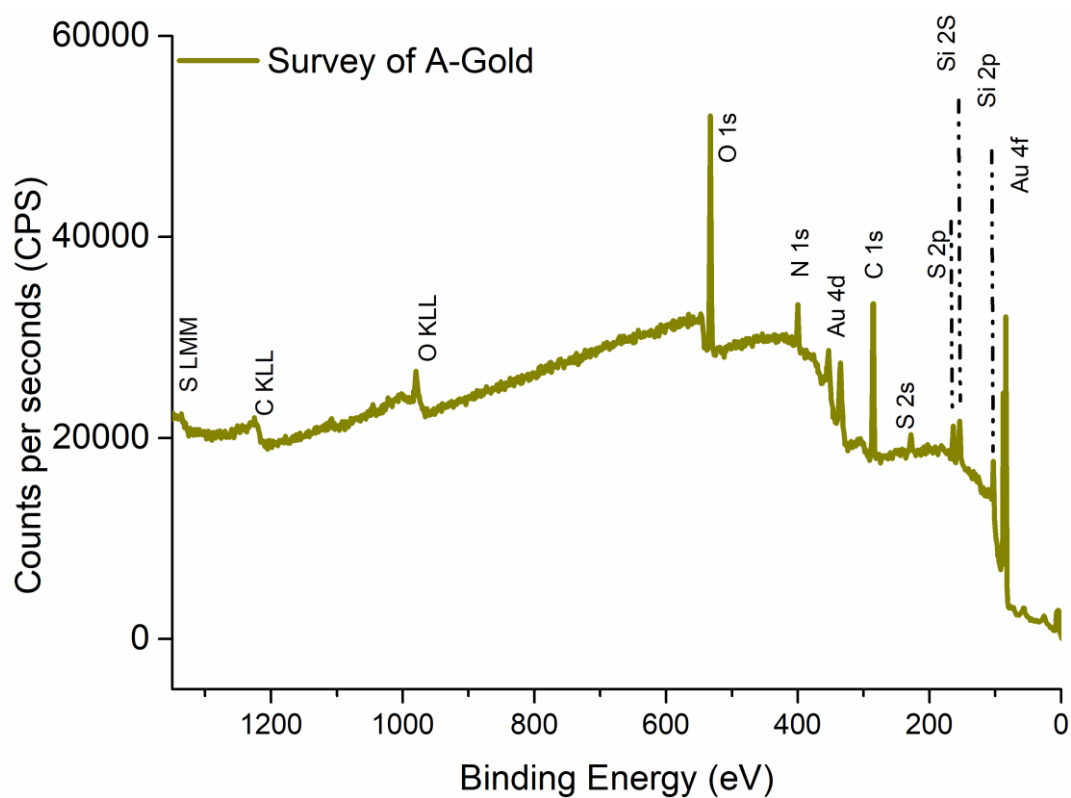

Figure S4 Example of survey spectrum of A-gold sample

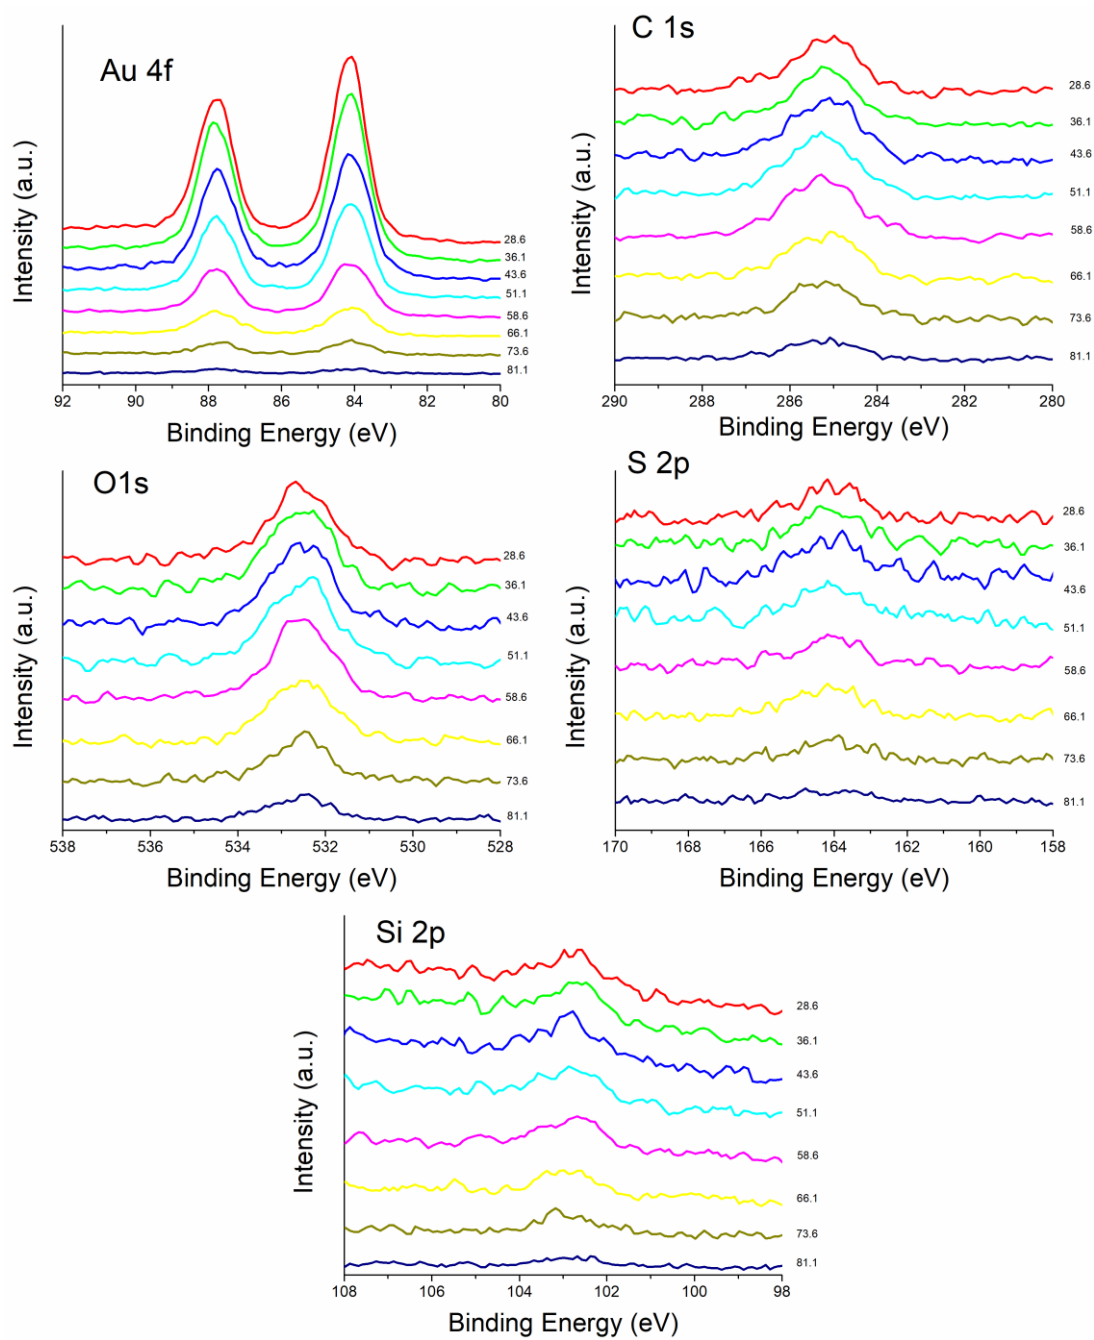

Figure S5 Angle-resolved high-resolution spectra of the Au 4f, C 1s, O 1s, S 2p and Si 2p of M-gold samples.

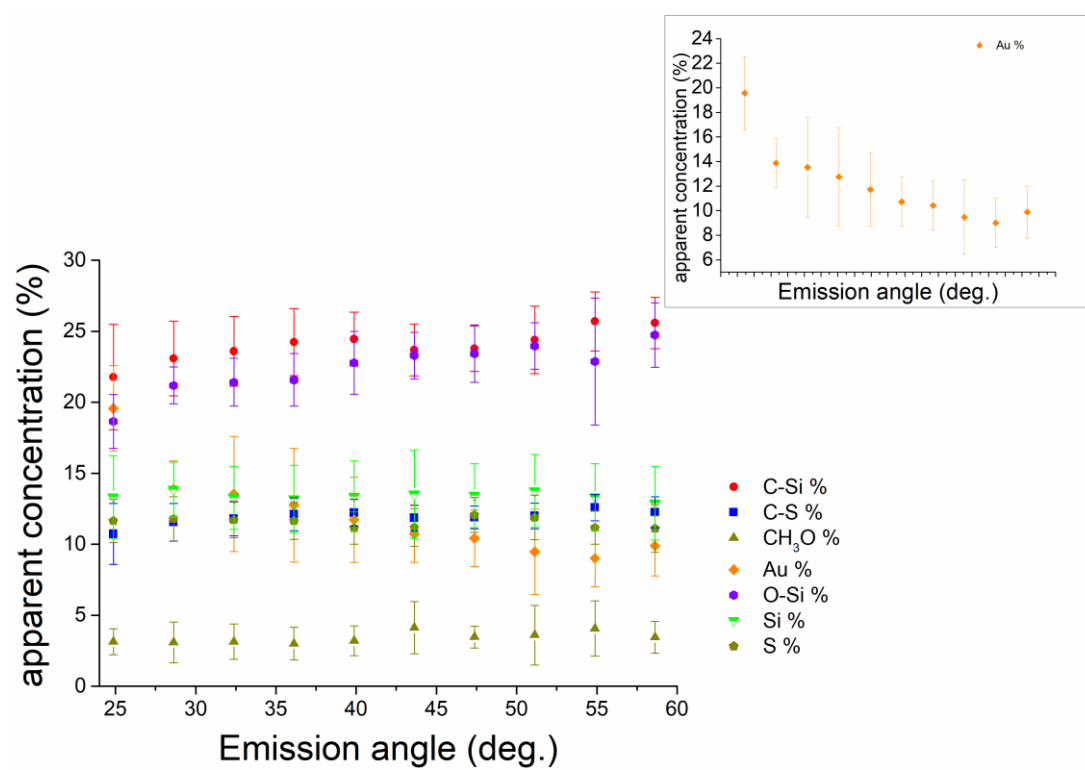

Figure S6 Apparent concentration (%) versus emission angle (a) and relative depth plot (b) for M-gold. (Inset: apparent concentration of gold (at%) versus emission angle) .

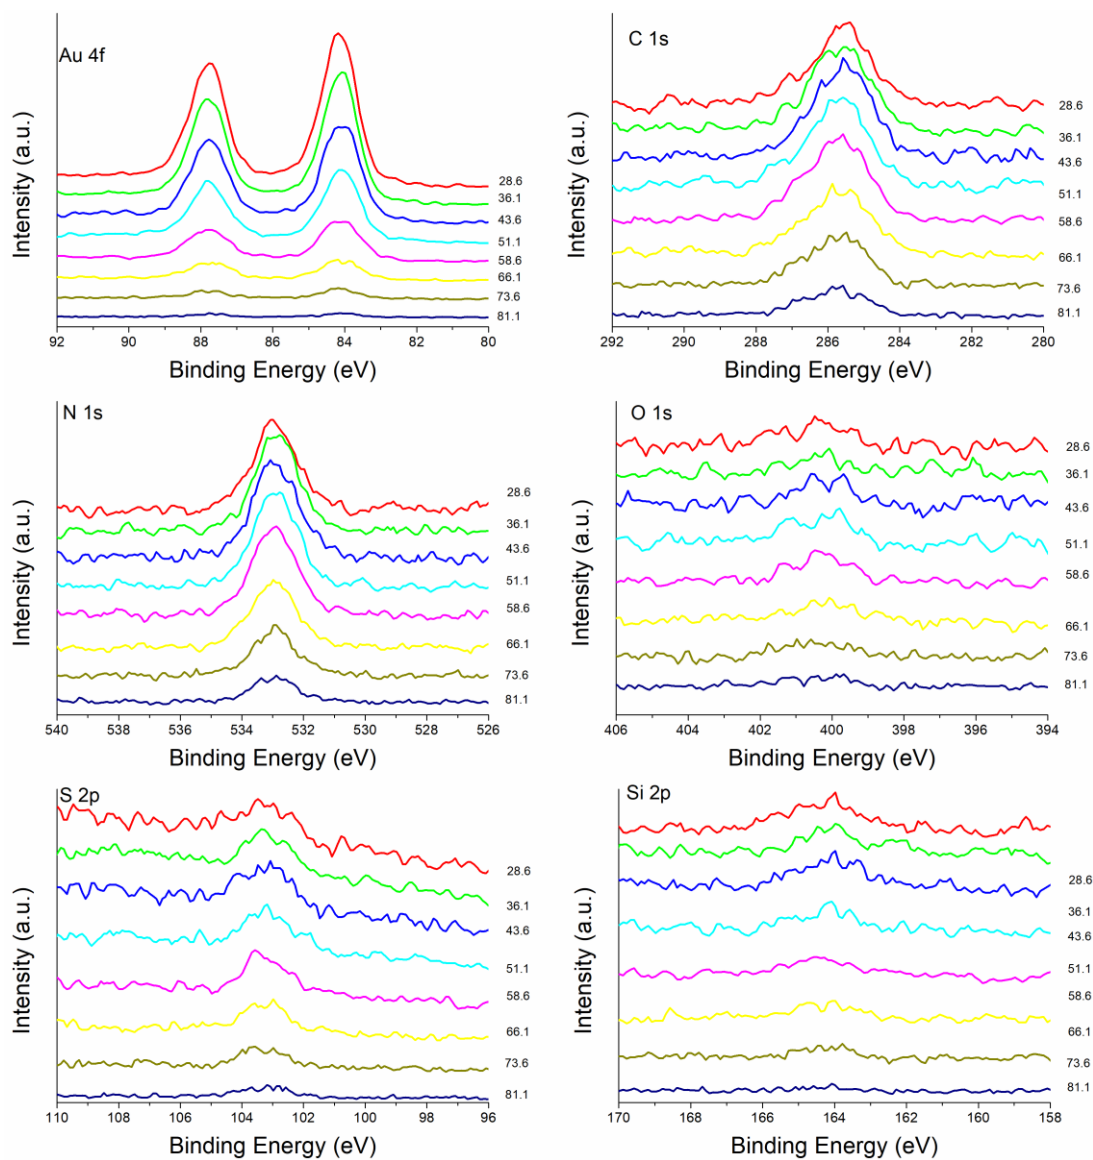

Figure S7 | Angle-resolved high-resolution spectra of the Au 4f, C 1s, O 1s, S 2p and Si 2p of A-gold samples

31. Scofield, J.H. Hartree-Slater Subshell Photoionization Cross-Sections at 1254 and 1487 eV. *Journal of Electron Spectroscopy and Related Phenomena* **1976**, 8, 129–137, doi:10.1016/0368-2048(76)80015-1.
